# Supplementary material for: Deciphering the Prognostic Landscape of Esophageal Adenocarcinoma: A PANoptosis-Related Gene Signature
Source: PubMed Central journal article supplement (PMC11660136; doi:10.7150/jca.102180), 2025-01-01
Supplement: jcav16p0183s1.pdf [file jcav16p0183s1.pdf]

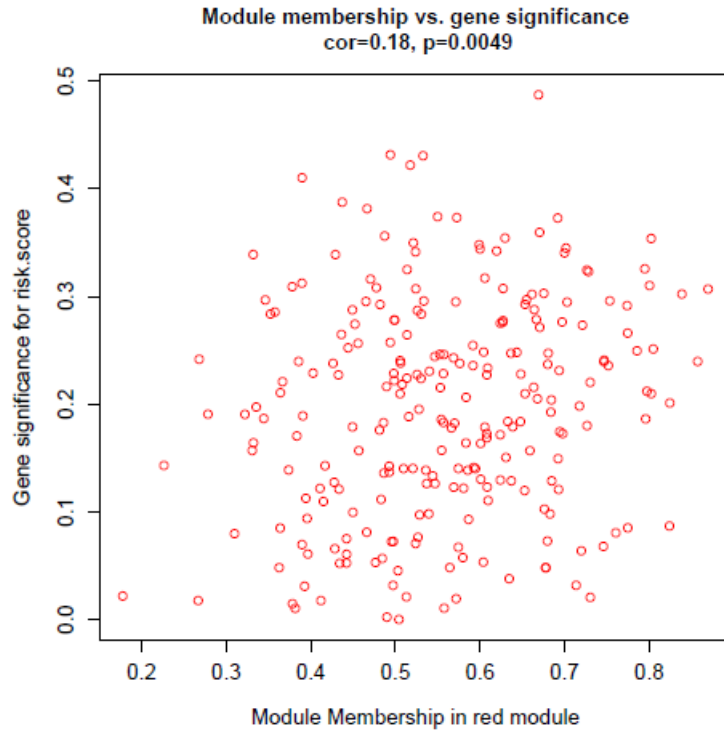

Supplementary Figure 1: Scatterplot illustrating the correlation between the red module and the PANoptosis gene module (cor=0.18, P=0.0049).

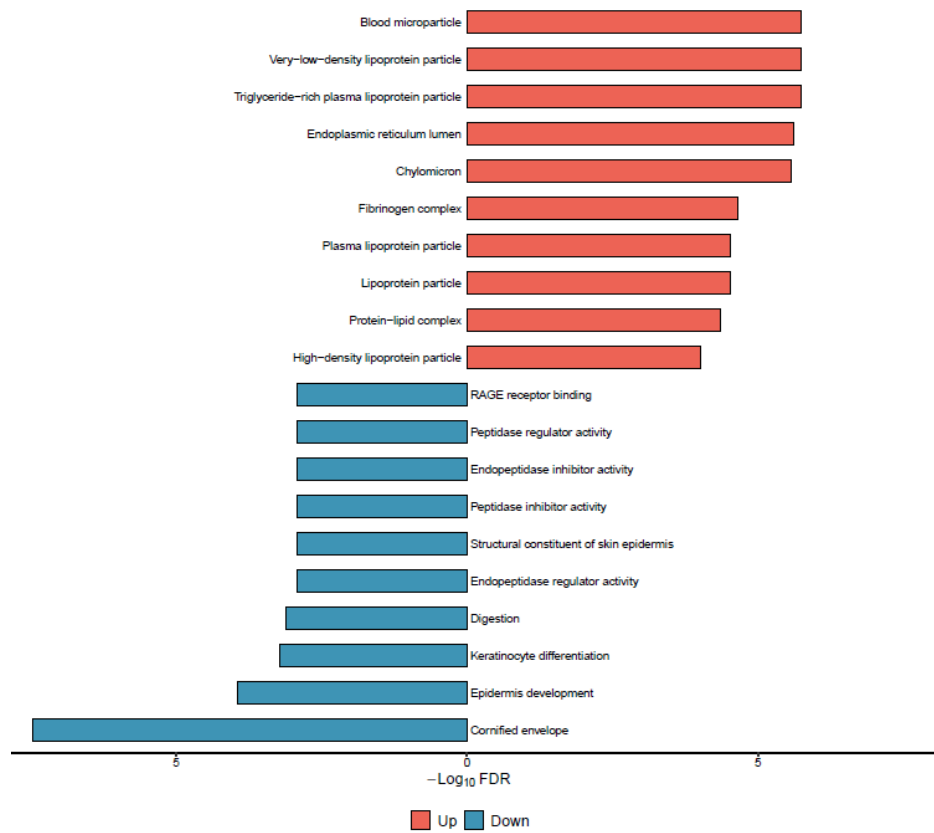

Supplementary Figure 2: Overrepresentation Analysis (ORA) enrichment of Gene Ontology (GO) terms.

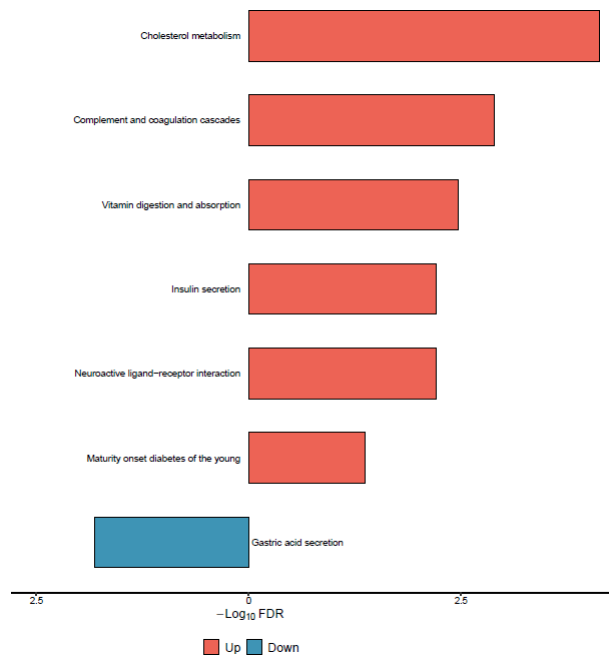

Supplementary Figure 3: Overrepresentation Analysis (ORA) enrichment of Kyoto Encyclopedia of Genes and Genomes (KEGG) pathways.

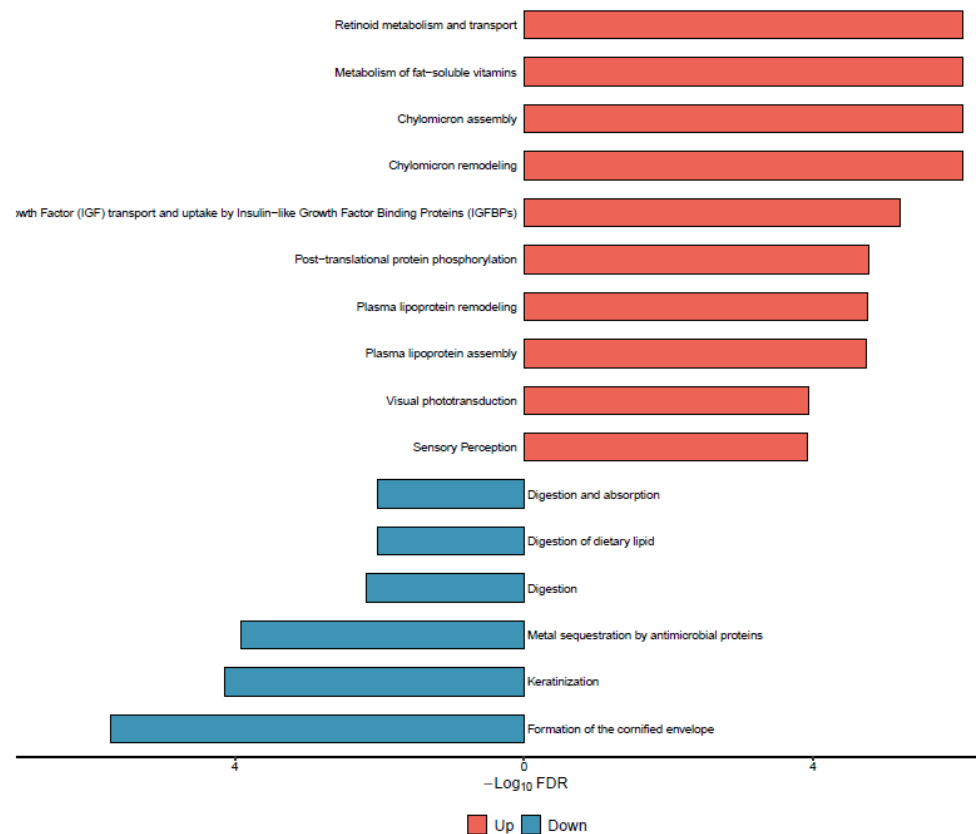

Supplementary Figure 4: Overrepresentation Analysis (ORA) enrichment of REACTOME pathways.

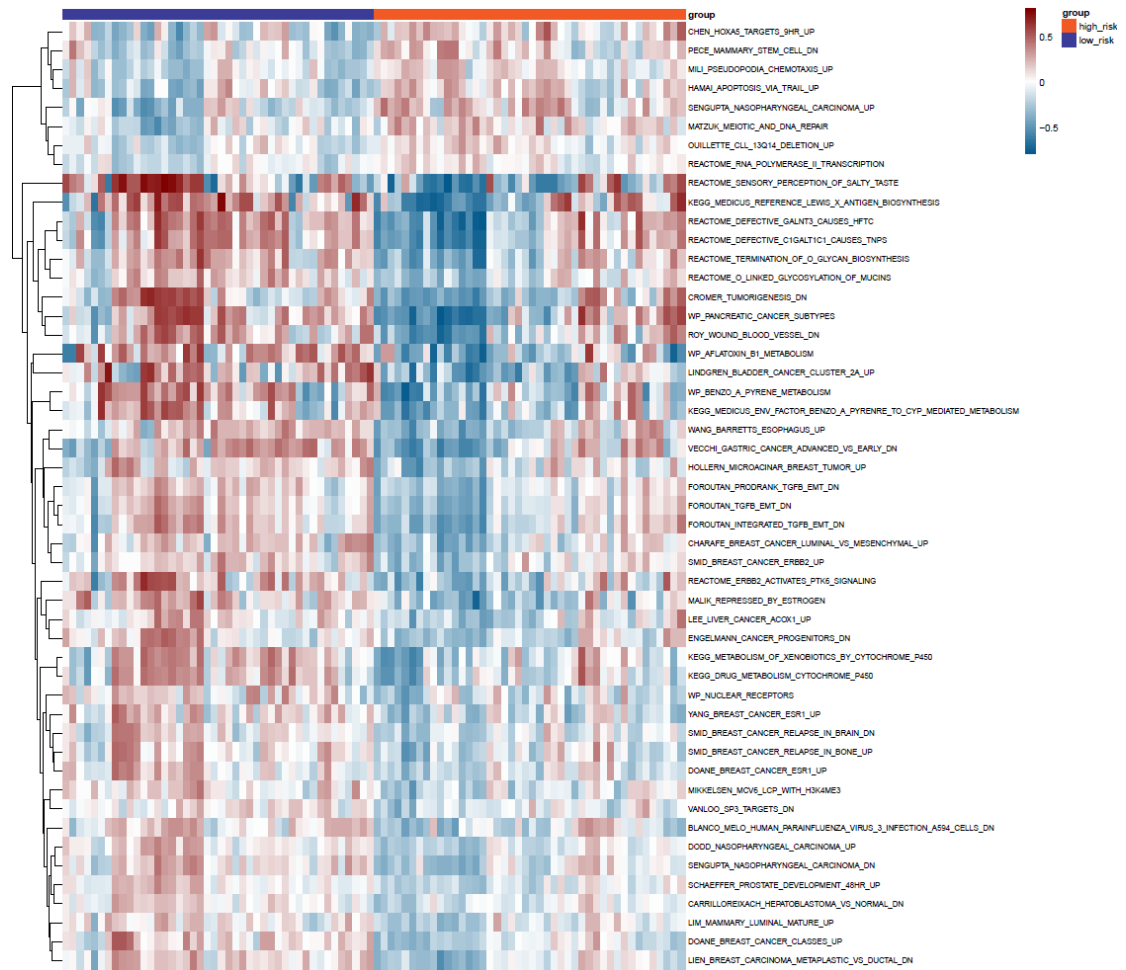

Supplementary Figure 5: Gene Set Variation Analysis (GSVA) heatmap for C2 gene sets.

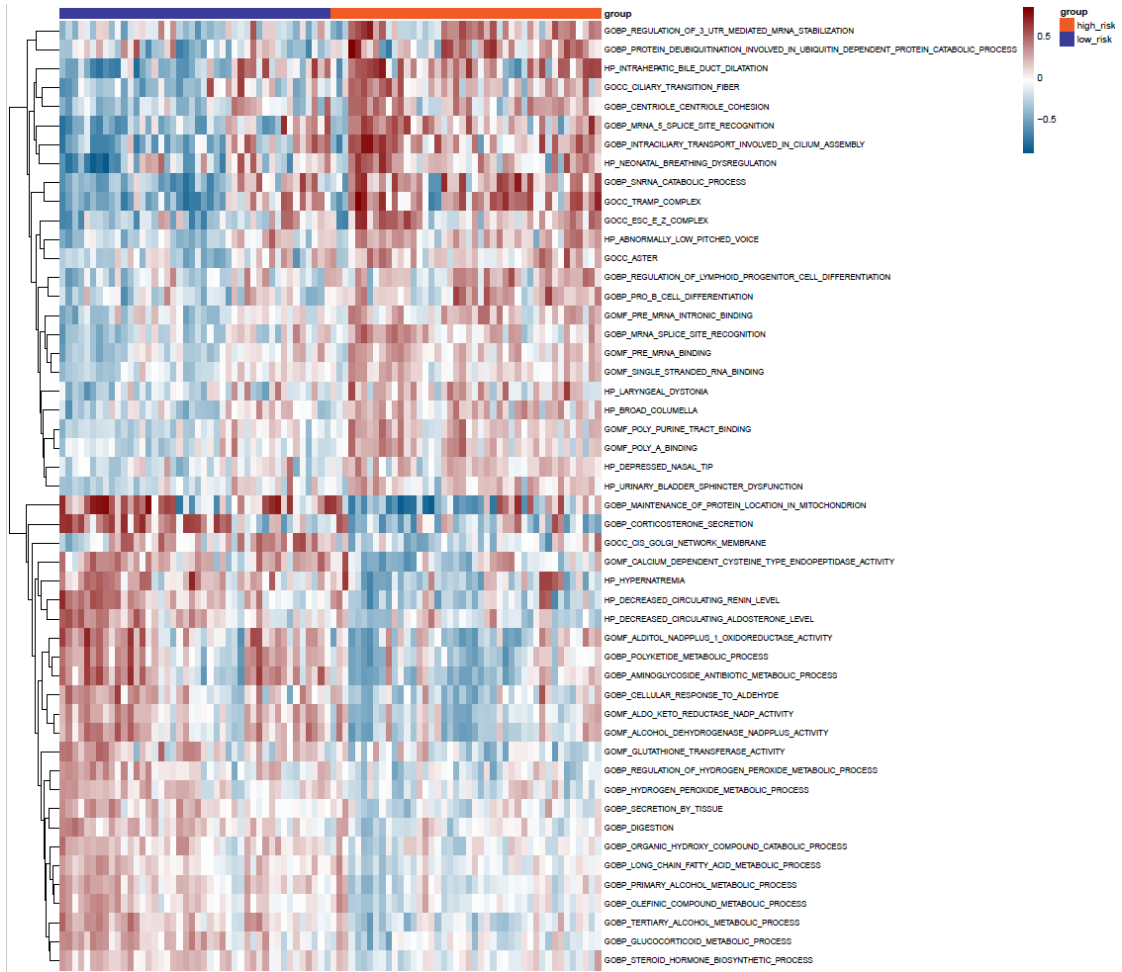

Supplementary Figure 6: Gene Set Variation Analysis (GSVA) heatmap for C5 gene sets.

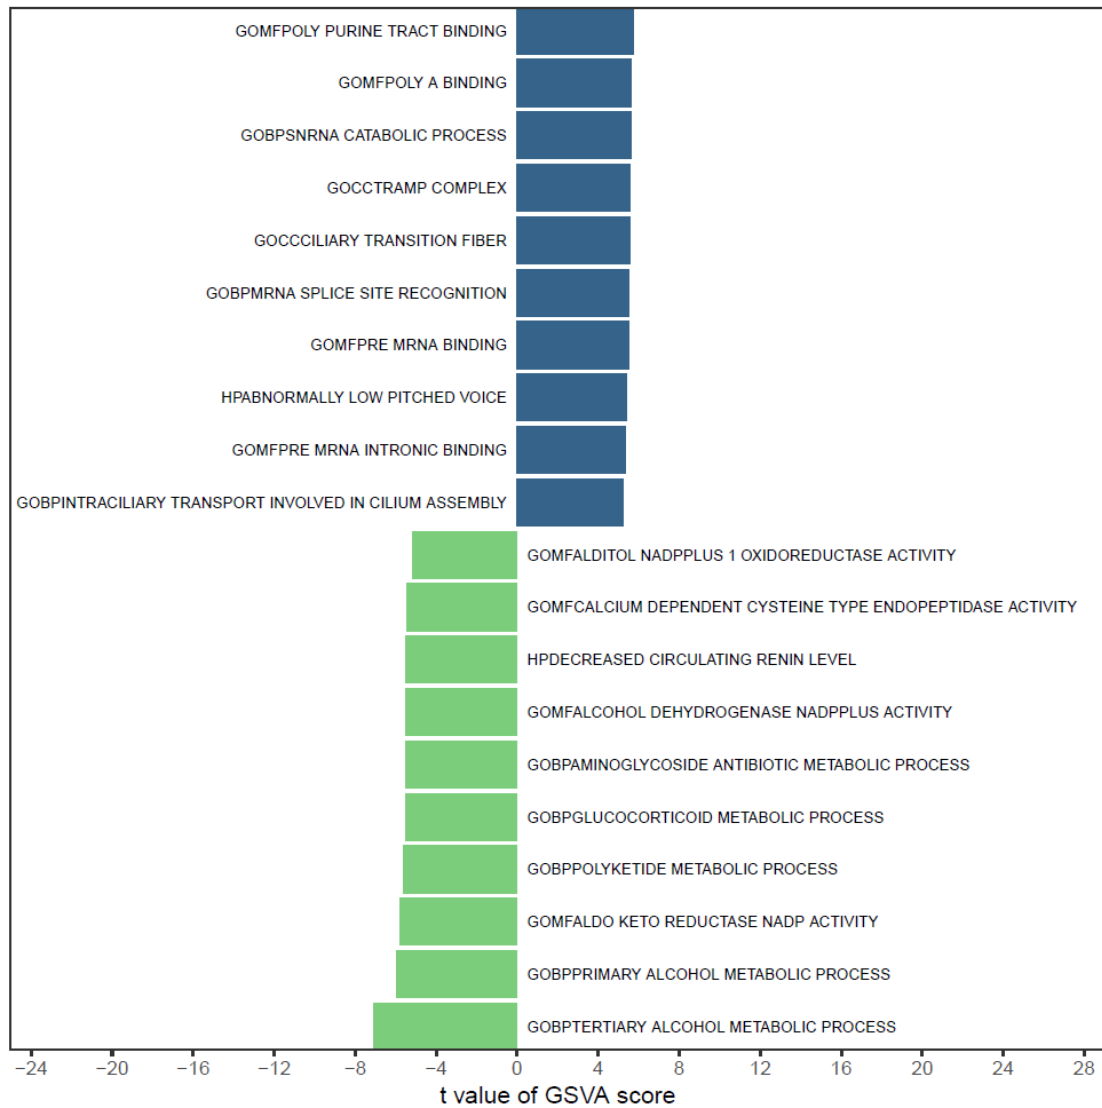

Supplementary Figure 7: Bar plot comparing the top 20 enriched C5 gene sets using GSVA.

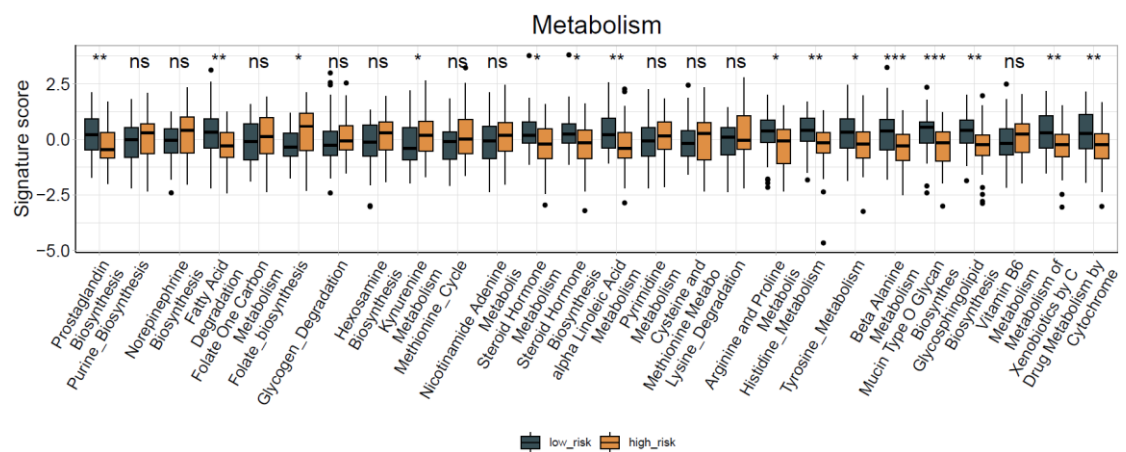

Supplementary Figure 8: Significant differences in the metabolic-immune spectra between high- and low-risk groups.

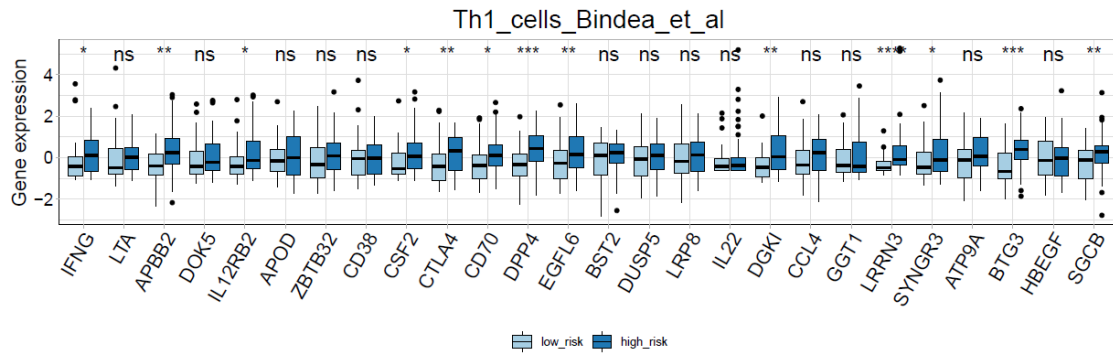

Supplementary Figure 9: Differential expression of Th1 cell-related genes between high- and low-risk groups.

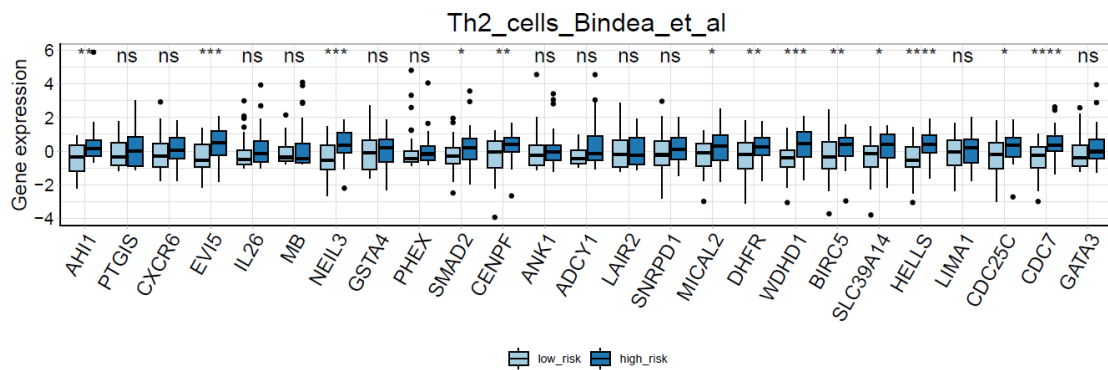

Supplementary Figure 10: Differential expression of Th2 cell-related genes between high- and low-risk groups.

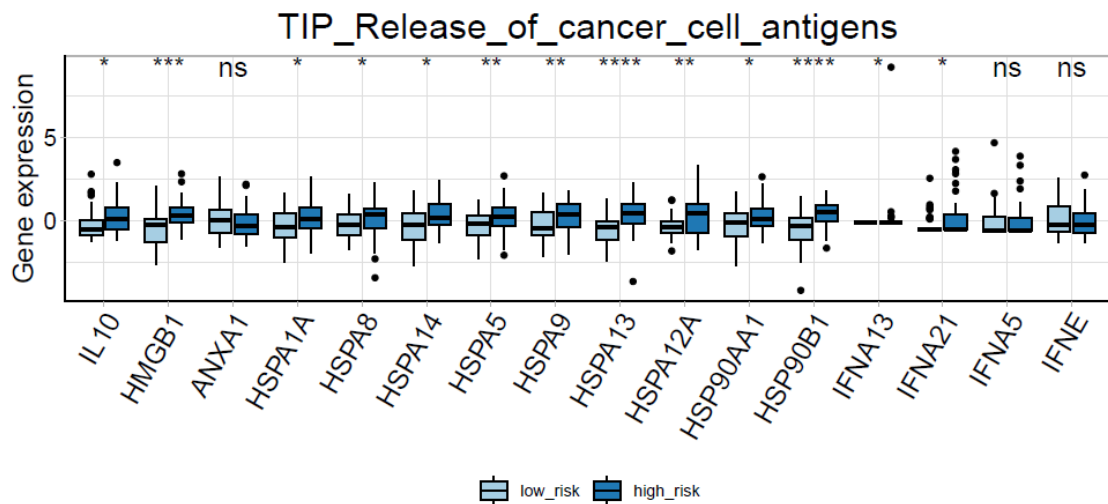

Supplementary Figure 11: Differential expression of genes related to the TIP (Tumor Immune Phenotype) mechanism of cancer cell antigen release between high- and low-risk groups.

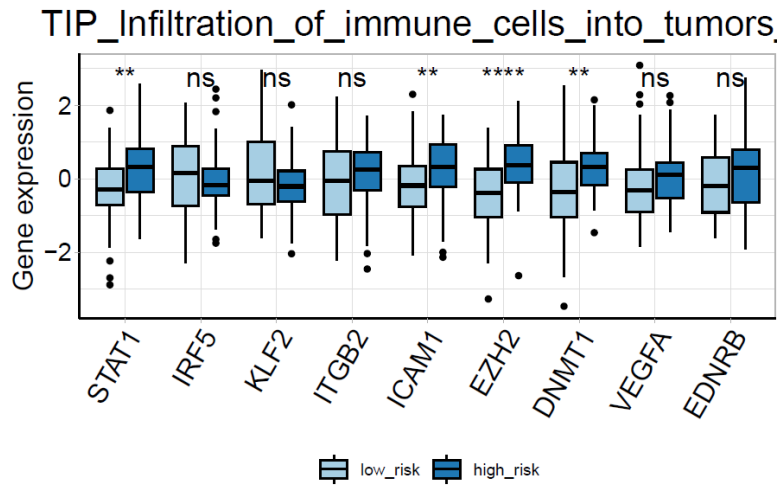

Supplementary Figure 12: Differential expression of genes related to the TIP mechanism of immune cell infiltration into tumors between high- and low-risk groups.

Supplementary Table2: The 8 PRGs with prognostic relevance (ATRX, TERT, PSMA1, ERBB2, CLU, MMP12, MSLN, and COL11A1) that were used to construct a risk score model.

| gene    | coef     |
|---------|----------|
| ATRX    | 0.558587 |
| TERT    | 0.210979 |
| PSMA1   | 0.115473 |
| ERBB2   | -0.09513 |
| CLU     | -0.09145 |
| MMP12   | 0.07644  |
| MSLN    | -0.04294 |
| COL11A1 | 0.006516 |
